# Supplementary material
Source: PubMed Central journal article supplement (PMC6053310)
Supplement: NIHMS946100-supplement-supplement_1.pdf [file NIHMS946100-supplement-supplement_1.pdf]

**Supplemental Table S1:** SNP-s that differentiate between patients with surgical NEC vs survivors without NEC at P<0.05.

| Chromosome | SNP           | BP        | Any Surgical NEC vs. survivors without any NEC |
|------------|---------------|-----------|------------------------------------------------|
| 2          | chr2:2009128  | 2009128   | 2.48E-05                                       |
| 2          | chr2:2009740  | 2009740   | 2.37E-05                                       |
| 2          | chr2:2011586  | 2011586   | 2.34E-05                                       |
| 2          | chr2:2011831  | 2011831   | 2.41E-05                                       |
| 2          | chr2:2017717  | 2017717   | 2.32E-05                                       |
| 2          | rs985467      | 2018776   | 2.32E-05                                       |
| 2          | rs1975138     | 2019396   | 2.38E-05                                       |
| 2          | chr2:2023335  | 2023335   | 2.48E-05                                       |
| 2          | chr2:4838394  | 4838394   | 4.39E-06                                       |
| 2          | rs61329746    | 7229778   | 7.32E-06                                       |
| 2          | rs13405184    | 184714614 | 0.002519                                       |
| 2          | rs16855974    | 217243369 | 9.52E-06                                       |
| 2          | rs62176284    | 217929020 | 7.87E-06                                       |
| 3          | chr3:8799428  | 8799428   | 7.92E-06                                       |
| 3          | chr3:8801391  | 8801391   | 4.26E-06                                       |
| 3          | rs9310398     | 12056755  | 9.09E-06                                       |
| 3          | rs12489177    | 12112247  | 9.76E-06                                       |
| 3          | chr3:12130256 | 12130256  | 9.81E-06                                       |
| 3          | rs2221190     | 20837858  | 0.004841                                       |
| 3          | rs11719409    | 73238693  | 6.94E-06                                       |
| 3          | rs6807768     | 73240773  | 8.92E-06                                       |
| 3          | rs62278736    | 161665370 | 8.66E-06                                       |
| 3          | rs62278737    | 161670589 | 8.76E-06                                       |
| 3          | rs62278738    | 161672359 | 5.08E-06                                       |
| 4          | rs9993049     | 4446985   | 0.02268                                        |
| 4          | rs16838298    | 6126549   | 0.01584                                        |
| 5          | rs6872963     | 38008780  | 0.0001618                                      |
| 5          | rs1508836     | 38008816  | 6.00E-05                                       |
| 5          | rs7445100     | 38009175  | 0.00016                                        |
| 5          | rs7445048     | 38009195  | 0.000172                                       |
| 5          | rs7445051     | 38009232  | 0.0001996                                      |
| 5          | rs10941377    | 38009426  | 0.0001719                                      |
| 5          | rs11955767    | 38009611  | 0.0001717                                      |
| 5          | rs10941378    | 38009643  | 0.0001712                                      |
| 5          | rs11949171    | 38009668  | 0.0001707                                      |

|   |               |          |           |
|---|---------------|----------|-----------|
| 5 | rs2174991     | 38009756 | 0.0001715 |
| 5 | rs2174990     | 38009798 | 0.0001743 |
| 5 | rs2174989     | 38010223 | 0.0001748 |
| 5 | rs1567327     | 38010364 | 0.00018   |
| 5 | rs1567326     | 38010488 | 0.000214  |
| 5 | rs1567324     | 38010656 | 0.0002179 |
| 5 | rs57448210    | 38010829 | 0.0002138 |
| 5 | rs11747656    | 38011408 | 0.000216  |
| 5 | rs11737936    | 38011472 | 0.0001947 |
| 5 | rs7447801     | 38011496 | 0.0003618 |
| 5 | rs2366974     | 38011531 | 8.73E-05  |
| 5 | rs1567328     | 38011935 | 0.0002203 |
| 5 | rs1396466     | 38012362 | 8.62E-05  |
| 5 | rs906684      | 38012564 | 8.44E-05  |
| 5 | rs1396465     | 38012789 | 8.71E-05  |
| 5 | rs868736      | 38013123 | 8.62E-05  |
| 5 | rs1508835     | 38013542 | 9.89E-05  |
| 5 | rs1022050     | 38014518 | 9.97E-05  |
| 5 | rs10039057    | 38018444 | 0.0001187 |
| 5 | rs390360      | 38020778 | 0.0001882 |
| 5 | rs390360      | 38020778 | 0.0001882 |
| 5 | rs371776      | 38020790 | 0.0001761 |
| 5 | rs371776      | 38020790 | 0.0001761 |
| 5 | rs429761      | 38021593 | 0.0002199 |
| 5 | rs429761      | 38021593 | 0.0002199 |
| 5 | rs270552      | 38038345 | 0.000219  |
| 5 | rs270552      | 38038345 | 0.000219  |
| 5 | rs1494642     | 38041588 | 0.0007133 |
| 5 | rs1494644     | 38041785 | 0.0001856 |
| 5 | rs1494644     | 38041785 | 0.0001856 |
| 5 | rs270547      | 38048313 | 0.001415  |
| 5 | rs270543      | 38052046 | 0.000871  |
| 5 | rs270538      | 38053333 | 0.0006958 |
| 5 | rs270537      | 38053488 | 0.0006963 |
| 5 | rs270599      | 38055273 | 0.003783  |
| 5 | rs6876101     | 38076068 | 0.0002645 |
| 5 | rs6876101     | 38076068 | 0.0002645 |
| 5 | chr5:38077178 | 38077178 | 0.0003752 |
| 5 | chr5:38077178 | 38077178 | 0.0003752 |
| 5 | rs7729645     | 38090710 | 0.001063  |
| 5 | rs2463765     | 38094717 | 0.0001086 |

|   |                |           |           |
|---|----------------|-----------|-----------|
| 5 | rs2453338      | 38094871  | 9.99E-05  |
| 5 | rs2471065      | 38095315  | 0.0002665 |
| 5 | rs186049       | 94273452  | 6.50E-06  |
| 5 | rs293040       | 94274954  | 6.78E-06  |
| 6 | rs6939601      | 155543991 | 2.88E-06  |
| 6 | rs7742211      | 155545023 | 7.28E-06  |
| 7 | rs9648634      | 9584964   | 8.32E-06  |
| 7 | rs41059        | 104157219 | 0.0007164 |
| 7 | rs41060        | 104157576 | 0.02784   |
| 7 | rs56402448     | 140086949 | 5.75E-06  |
| 8 | chr8:15436629  | 15436629  | 8.96E-06  |
| 8 | rs59885685     | 24176329  | 3.61E-06  |
| 8 | rs58578562     | 24180928  | 3.50E-06  |
| 8 | rs2955885      | 39865817  | 4.20E-06  |
| 8 | rs2981147      | 39866466  | 5.36E-06  |
| 8 | rs2981148      | 39866734  | 5.31E-06  |
| 8 | rs62514166     | 115868623 | 2.44E-08  |
| 8 | chr8:115870263 | 115870263 | 6.78E-09  |
| 8 | rs7013533      | 115871835 | 8.04E-09  |
| 8 | rs62514170     | 115875537 | 7.18E-09  |
| 8 | rs62514171     | 115876932 | 7.91E-09  |
| 8 | rs7820058      | 115878730 | 8.05E-09  |
| 8 | rs17729017     | 115881251 | 7.26E-09  |
| 8 | rs17667338     | 115882035 | 8.02E-09  |
| 8 | rs17729107     | 115882474 | 7.78E-09  |
| 8 | rs17667594     | 115883984 | 8.10E-09  |
| 8 | rs62514176     | 115884113 | 8.04E-09  |
| 8 | rs61423644     | 115884773 | 8.11E-09  |
| 8 | rs10955735     | 115888186 | 2.81E-08  |
| 8 | rs10505232     | 115890504 | 6.63E-09  |
| 8 | rs17729672     | 115891401 | 7.33E-09  |
| 8 | rs10505238     | 115892160 | 6.16E-07  |
| 8 | rs62514182     | 115892326 | 6.41E-07  |
| 8 | rs17729840     | 115892607 | 8.25E-09  |
| 8 | rs62514183     | 115893864 | 5.16E-08  |
| 8 | rs62514184     | 115894688 | 2.40E-08  |
| 8 | rs62514191     | 115904108 | 3.15E-08  |
| 8 | rs62514192     | 115904326 | 3.08E-08  |
| 8 | rs62514219     | 115909888 | 2.87E-08  |
| 8 | rs6993083      | 115910665 | 3.43E-08  |
| 8 | rs7015520      | 115910938 | 4.10E-08  |

|    |                 |           |           |
|----|-----------------|-----------|-----------|
| 8  | rs62511960      | 115912172 | 4.09E-08  |
| 9  | rs60140289      | 83929606  | 9.31E-06  |
| 10 | chr10:15127366  | 15127366  | 4.17E-06  |
| 10 | chr10:15128003  | 15128003  | 4.17E-06  |
| 10 | chr10:23702385  | 23702385  | 3.05E-06  |
| 10 | rs4747471       | 23713911  | 5.70E-06  |
| 10 | rs59547906      | 23717524  | 5.57E-06  |
| 10 | rs58614955      | 23717975  | 5.70E-06  |
| 10 | chr10:23720676  | 23720676  | 8.93E-06  |
| 10 | rs12571351      | 23724901  | 6.04E-06  |
| 10 | rs16923259      | 23732302  | 8.96E-06  |
| 10 | rs11013492      | 23736545  | 8.62E-06  |
| 10 | chr10:23739987  | 23739987  | 9.07E-06  |
| 10 | rs11013495      | 23740109  | 8.19E-06  |
| 10 | rs11013497      | 23741159  | 8.49E-06  |
| 10 | rs4747475       | 23743462  | 9.17E-06  |
| 10 | rs1398027       | 23747026  | 9.49E-06  |
| 10 | rs10828460      | 23752594  | 8.82E-06  |
| 10 | chr10:61291966  | 61291966  | 0.09738   |
| 10 | rs10824094      | 75934509  | 0.006345  |
| 10 | rs12570068      | 76060120  | 0.02745   |
| 10 | rs12570068      | 76060120  | 0.02745   |
| 11 | rs61732814      | 3638200   | 9.58E-06  |
| 11 | rs353561        | 35143503  | 0.04457   |
| 11 | chr11:124739699 | 124739699 | 4.24E-07  |
| 11 | chr11:124744005 | 124744005 | 4.01E-07  |
| 11 | chr11:124745346 | 124745346 | 1.33E-06  |
| 11 | chr11:124745427 | 124745427 | 4.13E-07  |
| 11 | chr11:124757762 | 124757762 | 3.75E-06  |
| 11 | chr11:124758518 | 124758518 | 4.51E-06  |
| 11 | rs12417435      | 124762165 | 3.83E-06  |
| 11 | chr11:124762541 | 124762541 | 8.37E-07  |
| 11 | rs12420431      | 124775157 | 9.44E-06  |
| 11 | rs12417970      | 124775608 | 9.41E-06  |
| 11 | rs28890569      | 124782873 | 9.59E-06  |
| 12 | rs11614182      | 101205025 | 0.0004304 |
| 12 | rs1704907       | 104910844 | 0.000874  |
| 12 | chr12:106489395 | 106489395 | 0.000638  |
| 13 | chr13:28365664  | 28365664  | 7.00E-06  |
| 13 | chr13:82687564  | 82687564  | 5.25E-06  |
| 14 | rs3742510       | 24783681  | 1.86E-07  |

|    |                |          |          |
|----|----------------|----------|----------|
| 14 | rs3742511      | 24784911 | 1.19E-07 |
| 14 | rs2295303      | 24788220 | 1.28E-07 |
| 14 | rs3181382      | 24789310 | 1.18E-07 |
| 15 | rs56381746     | 93693959 | 0.01769  |
| 15 | rs8038270      | 93695744 | 0.03309  |
| 15 | rs11634481     | 93696202 | 0.03161  |
| 15 | rs11633509     | 93696464 | 0.02982  |
| 15 | rs11639362     | 93696536 | 0.03174  |
| 15 | rs62043594     | 93697383 | 0.02498  |
| 15 | rs28557130     | 93697769 | 0.04415  |
| 16 | rs28431261     | 12710364 | 0.01699  |
| 16 | rs28583573     | 12710432 | 0.01379  |
| 16 | chr16:60394055 | 60394055 | 5.53E-06 |
| 16 | chr16:88057653 | 88057653 | 7.08E-06 |
| 16 | chr16:88061910 | 88061910 | 7.32E-06 |
| 16 | rs12444673     | 88076043 | 4.15E-06 |
| 16 | rs9936067      | 88076448 | 4.28E-06 |
| 16 | rs9927732      | 88076724 | 2.74E-07 |
| 16 | rs7501339      | 88077847 | 2.66E-06 |
| 16 | rs11646420     | 88082063 | 5.77E-06 |
| 16 | rs8057785      | 88083806 | 2.87E-06 |
| 16 | rs7404612      | 88085428 | 3.39E-06 |
| 16 | rs7404883      | 88085793 | 3.03E-06 |
| 16 | rs7405014      | 88085847 | 8.07E-06 |
| 16 | rs62046890     | 88086884 | 3.30E-06 |
| 16 | rs8061761      | 88089472 | 4.23E-06 |
| 16 | rs11117354     | 88092092 | 7.33E-06 |
| 16 | rs4843787      | 88101243 | 7.13E-06 |
| 18 | chr18:34485526 | 34485526 | 8.46E-06 |
| 18 | rs55703272     | 34493033 | 7.76E-06 |
| 18 | rs55843613     | 34501397 | 7.96E-06 |
| 18 | rs10502668     | 34502592 | 8.56E-06 |
| 18 | rs17652543     | 34507893 | 8.54E-06 |
| 18 | rs55911314     | 34525724 | 8.61E-06 |
| 18 | chr18:34528373 | 34528373 | 8.55E-06 |
| 18 | rs17567772     | 34534331 | 8.48E-06 |
| 18 | rs60932967     | 34540903 | 8.68E-06 |
| 18 | rs4578744      | 34542039 | 8.57E-06 |
| 18 | chr18:34542430 | 34542430 | 8.71E-06 |
| 18 | chr18:34544810 | 34544810 | 9.31E-06 |
| 18 | chr18:34559740 | 34559740 | 8.49E-06 |

|    |                |          |          |
|----|----------------|----------|----------|
| 18 | rs55823421     | 34569177 | 8.52E-06 |
| 18 | chr18:34577075 | 34577075 | 8.69E-06 |
| 18 | chr18:34583112 | 34583112 | 8.49E-06 |
| 18 | rs55878137     | 34588645 | 6.60E-06 |
| 18 | chr18:34594752 | 34594752 | 6.58E-06 |
| 18 | chr18:34600283 | 34600283 | 6.67E-06 |
| 18 | rs58642886     | 34601930 | 7.28E-06 |
| 18 | rs17567885     | 34616392 | 6.56E-06 |
| 18 | rs17652687     | 34635014 | 6.49E-06 |
| 18 | rs2046472      | 34637060 | 6.67E-06 |
| 18 | chr18:34643523 | 34643523 | 6.48E-06 |
| 18 | chr18:34650496 | 34650496 | 6.47E-06 |
| 18 | rs55894152     | 34661012 | 7.56E-06 |
| 18 | chr18:34663119 | 34663119 | 6.37E-06 |
| 18 | rs17567967     | 34663639 | 6.38E-06 |
| 18 | chr18:34669431 | 34669431 | 6.47E-06 |
| 18 | rs59618460     | 34678477 | 7.00E-06 |
| 18 | chr18:34692012 | 34692012 | 6.30E-06 |
| 18 | chr18:34721453 | 34721453 | 6.24E-06 |
| 18 | rs56319145     | 34729532 | 6.23E-06 |
| 18 | rs17652799     | 34738359 | 6.20E-06 |
| 18 | chr18:34745428 | 34745428 | 6.29E-06 |
| 18 | chr18:34747655 | 34747655 | 6.34E-06 |
| 18 | rs17652947     | 34760133 | 6.30E-06 |
| 18 | chr18:34796827 | 34796827 | 6.28E-06 |
| 18 | chr18:34799705 | 34799705 | 7.49E-06 |
| 18 | rs2017027      | 34805194 | 1.62E-06 |
| 18 | rs752008       | 34819337 | 5.08E-06 |
| 18 | rs1443639      | 34822373 | 1.62E-06 |
| 18 | rs58298238     | 34831424 | 1.70E-06 |
| 18 | rs61738914     | 39086634 | 2.81E-06 |
| 18 | chr18:39098468 | 39098468 | 3.99E-06 |
| 18 | rs7238000      | 39102900 | 7.21E-06 |
| 18 | chr18:39109902 | 39109902 | 9.70E-06 |
| 18 | chr18:39111622 | 39111622 | 1.53E-06 |
| 18 | rs16974879     | 39112256 | 6.05E-06 |
| 18 | chr18:39119632 | 39119632 | 7.43E-06 |
| 18 | rs61446585     | 39122938 | 8.94E-06 |
| 18 | chr18:39130032 | 39130032 | 1.26E-06 |
| 18 | rs1539869      | 39130167 | 1.56E-06 |
| 18 | chr18:39134006 | 39134006 | 1.83E-06 |

|    |                |          |           |
|----|----------------|----------|-----------|
| 18 | rs12457704     | 39134624 | 1.83E-06  |
| 18 | rs8093213      | 39138623 | 1.79E-06  |
| 18 | chr18:39140360 | 39140360 | 1.77E-06  |
| 18 | chr18:39142642 | 39142642 | 1.77E-06  |
| 18 | rs12455274     | 39143429 | 1.77E-06  |
| 18 | rs17080556     | 66864039 | 0.0007455 |
| 18 | rs11659472     | 66864528 | 0.0001374 |
| 18 | rs9949127      | 66874976 | 0.0002838 |
| 18 | rs1154907      | 66879447 | 0.001732  |
| 19 | rs1985579      | 13358354 | 0.007834  |
| 20 | rs17694826     | 15588780 | 3.42E-06  |
| 20 | rs17694839     | 15590487 | 3.28E-06  |
| 20 | rs34466545     | 42079587 | 2.82E-06  |
| 20 | rs13039111     | 42082654 | 2.65E-06  |
| 20 | rs35932598     | 42083069 | 2.46E-06  |
| 20 | rs35198725     | 42084048 | 1.95E-06  |
| 21 | rs2824440      | 19045684 | 4.65E-05  |
| 21 | rs9983828      | 32630308 | 0.002922  |
| 22 | rs4822112      | 42731540 | 5.27E-06  |
| 22 | rs5758713      | 42744362 | 6.52E-06  |
| 22 | rs5751267      | 42747847 | 7.89E-06  |
| 22 | rs4239898      | 42752280 | 6.01E-06  |

**Supplemental Table S2.** SNPs found significantly associated at less than  $p=10^{-6}$  with surgical NEC by GWAS. (CHR: Chromosome; BP: Base pair location)

| CHR | SNP             | BP       | Any Surgical NEC vs. survivors without any NEC | Surgical NEC or death vs. survival without either Medical or Surgical NEC | Proven NEC (Stage II or greater) or Death vs. survival without proven NEC |
|-----|-----------------|----------|------------------------------------------------|---------------------------------------------------------------------------|---------------------------------------------------------------------------|
| 8   | rs10505232      | 1.16E+08 | 6.63E-09                                       | 2.85E-05                                                                  | 5.90E-05                                                                  |
| 8   | chr8:115870263  | 1.16E+08 | 6.78E-09                                       | 2.20E-05                                                                  | 4.22E-05                                                                  |
| 8   | rs62514170      | 1.16E+08 | 7.18E-09                                       | 2.19E-05                                                                  | 4.30E-05                                                                  |
| 8   | rs17729017      | 1.16E+08 | 7.26E-09                                       | 2.17E-05                                                                  | 4.28E-05                                                                  |
| 8   | rs17729672      | 1.16E+08 | 7.33E-09                                       | 3.14E-05                                                                  | 6.43E-05                                                                  |
| 8   | rs17729107      | 1.16E+08 | 7.78E-09                                       | 2.30E-05                                                                  | 4.55E-05                                                                  |
| 8   | rs62514171      | 1.16E+08 | 7.91E-09                                       | 2.37E-05                                                                  | 4.63E-05                                                                  |
| 8   | rs17667338      | 1.16E+08 | 8.02E-09                                       | 2.36E-05                                                                  | 4.65E-05                                                                  |
| 8   | rs62514176      | 1.16E+08 | 8.04E-09                                       | 2.38E-05                                                                  | 4.70E-05                                                                  |
| 8   | rs7013533       | 1.16E+08 | 8.04E-09                                       | 2.49E-05                                                                  | 4.83E-05                                                                  |
| 8   | rs7820058       | 1.16E+08 | 8.05E-09                                       | 2.34E-05                                                                  | 4.62E-05                                                                  |
| 8   | rs17667594      | 1.16E+08 | 8.10E-09                                       | 2.38E-05                                                                  | 4.69E-05                                                                  |
| 8   | rs61423644      | 1.16E+08 | 8.11E-09                                       | 2.39E-05                                                                  | 4.76E-05                                                                  |
| 8   | rs17729840      | 1.16E+08 | 8.25E-09                                       | 3.09E-05                                                                  | 6.65E-05                                                                  |
| 8   | rs62514184      | 1.16E+08 | 2.40E-08                                       | 0.000955                                                                  | 0.001036                                                                  |
| 8   | rs62514166      | 1.16E+08 | 2.44E-08                                       | 0.000499                                                                  | 0.000491                                                                  |
| 8   | rs10955735      | 1.16E+08 | 2.81E-08                                       | 0.00071                                                                   | 0.000735                                                                  |
| 8   | rs62514219      | 1.16E+08 | 2.87E-08                                       | 0.001104                                                                  | 0.001202                                                                  |
| 8   | rs62514192      | 1.16E+08 | 3.08E-08                                       | 0.001084                                                                  | 0.001195                                                                  |
| 8   | rs62514191      | 1.16E+08 | 3.15E-08                                       | 0.000404                                                                  | 0.000523                                                                  |
| 8   | rs6993083       | 1.16E+08 | 3.43E-08                                       | 0.001169                                                                  | 0.00132                                                                   |
| 8   | rs62511960      | 1.16E+08 | 4.09E-08                                       | 0.001596                                                                  | 0.001834                                                                  |
| 8   | rs7015520       | 1.16E+08 | 4.10E-08                                       | 0.001606                                                                  | 0.001842                                                                  |
| 8   | rs62514183      | 1.16E+08 | 5.16E-08                                       | 0.000811                                                                  | 0.00093                                                                   |
| 14  | rs3181382       | 24789310 | 1.18E-07                                       | 0.00048                                                                   | 0.000738                                                                  |
| 14  | rs3742511       | 24784911 | 1.19E-07                                       | 0.000533                                                                  | 0.000831                                                                  |
| 14  | rs2295303       | 24788220 | 1.28E-07                                       | 0.000482                                                                  | 0.000746                                                                  |
| 14  | rs3742510       | 24783681 | 1.86E-07                                       | 0.000632                                                                  | 0.000978                                                                  |
| 16  | rs9927732       | 88076724 | 2.74E-07                                       | 0.000557                                                                  | 0.000471                                                                  |
| 11  | chr11:124744005 | 1.25E+08 | 4.01E-07                                       | 0.05929                                                                   | 0.01019                                                                   |
| 11  | chr11:124745427 | 1.25E+08 | 4.13E-07                                       | 0.05935                                                                   | 0.01019                                                                   |
| 11  | chr11:124739699 | 1.25E+08 | 4.24E-07                                       | 0.04873                                                                   | 0.008359                                                                  |
| 8   | rs10505238      | 1.16E+08 | 6.16E-07                                       | 0.000939                                                                  | 0.001255                                                                  |
| 8   | rs62514182      | 1.16E+08 | 6.41E-07                                       | 0.000971                                                                  | 0.001327                                                                  |
| 11  | chr11:124762541 | 1.25E+08 | 8.37E-07                                       | 0.07                                                                      | 0.01187                                                                   |



**Supplementary Table S3 A:** Allelic frequencies of rs7820058 in Stage II NEC in infants surviving >7d vs. Survival without medical or surgical NEC across the entire NRN cohort.

|                                               |                   |                     |
|-----------------------------------------------|-------------------|---------------------|
| P=0.2812<br>Chi square (O.R. 1.67, 0.77-3.60) | NEC (n=76)        | NO NEC (n=1092)     |
| Major Allele (A)                              | <b>68 (89.5%)</b> | <b>1020 (93.4%)</b> |
| Minor Allele (G)                              | <b>8 (10.5%)</b>  | <b>72 (6.6%)</b>    |

**Supplementary Table S3 B:** Allelic frequencies of rs7820058 in Stage II NEC or death in infants surviving >7d vs. Survival without medical or surgical NEC across the entire NRN cohort.

|                                                 |                    |                     |
|-------------------------------------------------|--------------------|---------------------|
| P=0.4259<br>Chi square (O.R. 1.34, 0.74 – 2.44) | NEC (n=162)        | NO NEC (n=1092)     |
| Major Allele (A)                                | <b>148 (91.4%)</b> | <b>1020 (93.4%)</b> |
| Minor Allele (G)                                | <b>14 (8.6%)</b>   | <b>72 (6.6%)</b>    |

**Supplemental Table S4:** Minor allele frequencies and P values in patients with and without NEC in the validation cohort.

| SNP | CHR        | Minor Allele Frequency NEC | Minor Allele Frequency No NEC | P       |
|-----|------------|----------------------------|-------------------------------|---------|
| 8   | rs10086373 | 0.04762                    | 0.03774                       | 0.7588  |
| 8   | rs10090163 | 0.07895                    | 0.07465                       | 0.9415  |
| 8   | rs10091791 | 0.07143                    | 0.1142                        | 0.3864  |
| 8   | rs10093354 | 0.3095                     | 0.3551                        | 0.5771  |
| 8   | rs10094041 | 0.119                      | 0.1206                        | 0.9962  |
| 8   | rs10097028 | 0.2857                     | 0.2866                        | 0.9721  |
| 8   | rs10099099 | 0.1429                     | 0.1011                        | 0.405   |
| 8   | rs10429403 | 0.07143                    | 0.0599                        | 0.7649  |
| 8   | rs10505228 | 0.05                       | 0.1061                        | 0.2473  |
| 8   | rs10505243 | 0.2857                     | 0.2422                        | 0.5225  |
| 8   | rs10755911 | 0.3571                     | 0.2303                        | 0.06143 |
| 8   | rs11988351 | 0.5714                     | 0.4994                        | 0.3855  |
| 8   | rs11989244 | 0.2                        | 0.277                         | 0.3045  |
| 8   | rs11994126 | 0.07143                    | 0.101                         | 0.5293  |
| 8   | rs13252246 | 0.1667                     | 0.07125                       | 0.01968 |
| 8   | rs1470969  | 0.4286                     | 0.3763                        | 0.4847  |
| 8   | rs16886394 | 0.07143                    | 0.1033                        | 0.5414  |
| 8   | rs16886637 | 0.2381                     | 0.1945                        | 0.5157  |
| 8   | rs16886649 | 0.04762                    | 0.07654                       | 0.5066  |
| 8   | rs16886751 | 0.04762                    | 0.06595                       | 0.6384  |
| 8   | rs17733014 | 0.1905                     | 0.1443                        | 0.4101  |
| 8   | rs1872780  | 0.1667                     | 0.2384                        | 0.2951  |
| 8   | rs2357704  | 0.381                      | 0.309                         | 0.3214  |
| 8   | rs2631813  | 0.4048                     | 0.4001                        | 0.9421  |
| 8   | rs4515577  | 0.1667                     | 0.1656                        | 0.9836  |
| 8   | rs6469557  | 0.07143                    | 0.03153                       | 0.1808  |
| 8   | rs666095   | 0.3421                     | 0.3594                        | 0.8558  |
| 8   | rs673380   | 0.1429                     | 0.1964                        | 0.3896  |
| 8   | rs6986502  | 0.3571                     | 0.357                         | 0.9954  |
| 8   | rs7004742  | 0.381                      | 0.3864                        | 0.9352  |
| 8   | rs7820058  | 0.07143                    | 0.09348                       | 0.6382  |
| 8   | rs7828196  | 0.04762                    | 0.07484                       | 0.5015  |
| 8   | rs7842690  | 0.3333                     | 0.303                         | 0.6712  |
| 8   | rs9297534  | 0.4048                     | 0.4373                        | 0.6927  |
